# Supplementary material for: Glucosamine stimulates pheromone-independent dimorphic transition in Cryptococcus neoformans by promoting Crz1 nuclear translocation
Source: PLOS journal article supplement (doi:10.1371/journal.pgen.1006982), 2017-09-12

Supplemental Figure 4

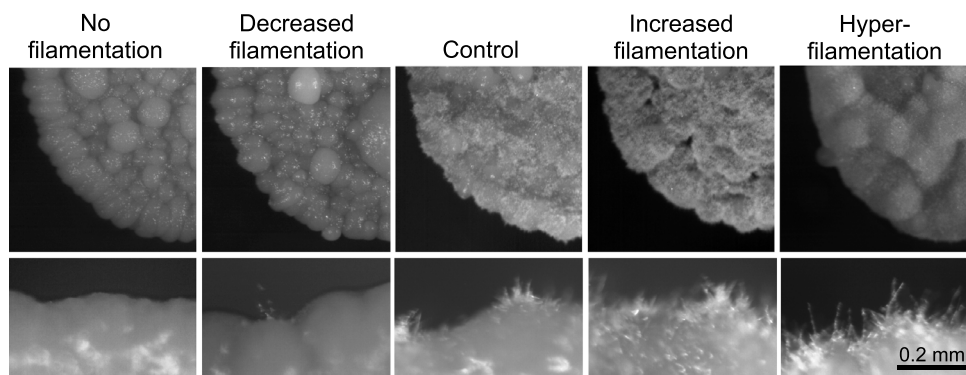

Supplement: S4 (10.1371/journal.pgen.1006982.s004) [file journal.pgen.1006982.s004]
